# Supplementary material for: X-ray-triggered through-space charge transfer and photochromism in silver nanoclusters
Source: Royal Society of Chemistry journal article supplement (doi:10.1039/d3nr05409h), 2024-01-01
Supplement: d3nr05409h1.pdf [file d3nr05409h1.pdf]

## Supporting Information

### X-ray-Triggered Through-space Charge Transfer and Photochromism in Silver Nanoclusters

Zhen Ren<sup>a§</sup>, Jun-Jun Sun<sup>a§</sup>, Long Xu<sup>c</sup>, Peng Luo<sup>a</sup>, Zi-Wei Ma<sup>a</sup>, Si Li<sup>b</sup>, Yu-Bing Si<sup>b</sup>,  
Xi-Yan Dong<sup>a,b,\*</sup>, Fangfang Pan<sup>c,\*</sup>

<sup>a</sup> College of Chemistry and Chemical Engineering, Henan Polytechnic University, Jiaozuo  
454000, China

<sup>b</sup> College of Chemistry, Zhengzhou University, Zhengzhou 450001, China

<sup>c</sup> College of Chemistry, Central China Normal University, Wuhan 430079, China

## Materials and chemicals.

All chemicals and solvents obtained from suppliers were used without further purification. Ethanol (EtOH, 99.5%), Methanol (99.5%), Silver oxide (Ag<sub>2</sub>O, 99.7%), 3,3-Dimethyl-1-butyne (tBuC≡CH, 95%), Ammonium hydroxide solution (NH<sub>4</sub>OH, 28%), Silver trifluoroacetate (AgC<sub>2</sub>F<sub>3</sub>O<sub>2</sub>, 98%), Silver tetrafluoroborate (AgBF<sub>4</sub>, 99%), Acetonitrile (CH<sub>3</sub>CN, 99.5%), Sodium chloride (NaCl, 99.5%), N,N-Dimethylformamide (DMF, 99.5%) were obtained from Macklin.

## Crystallographic data collection and structural refinement.

Single-crystal X-ray diffraction measurement of Ag<sub>14</sub>-II were performed on a Rigaku XtaLAB Pro diffractometer with Cu-K $\alpha$  radiation ( $\lambda = 1.54184 \text{ \AA}$ ), Mo-K $\alpha$  radiation ( $\lambda = 0.71073 \text{ \AA}$ ) at 200 K and Bruker APEX-II CCD diffractometer with Ga-K $\alpha$  radiation ( $\lambda = 1.34139 \text{ \AA}$ ) at 100 K and 300K. Cl@Ag<sub>14</sub>BF<sub>4</sub> were performed on a Rigaku XtaLAB Pro diffractometer with Mo-K $\alpha$  radiation ( $\lambda = 0.71073 \text{ \AA}$ ) at 200 K. F@Ag<sub>14</sub>OH and Br@Ag<sub>14</sub>OH were performed on a Bruker APEX-II CCD diffractometer with Ga-K $\alpha$  radiation ( $\lambda = 1.34139 \text{ \AA}$ ) at 100 K. Ag<sub>14</sub>-I were performed on a Bruker APEX-II CCD diffractometer with Ga-K $\alpha$  radiation ( $\lambda = 1.34139 \text{ \AA}$ ) at 100 K. Data collection and reduction were performed using the program CrysAlisPro [1]. The structures were solved with direct methods (SHELXS) [2] and refined by full-matrix least squares on  $F^2$  using OLEX2 [3], which utilizes the SHELXL-2015 module [4]. All non-hydrogen atoms were refined anisotropically, and the hydrogen atoms were placed in idealized position. The crystal structures are visualized by DIAMOND 3.2 [5]. Detailed information on the crystal data, data collection and refinement data for Ag<sub>14</sub> are summarized in Table S1, S2, S3, S4 and S6.

## DFT calculation.

To provide a better understanding of the photophysical properties of Ag cluster, the excited states were simulated by density functional theory (DFT) / time-dependent density functional theory (TDDFT) at PBE0/def2-SVP theoretical level with use of Q-Chem program [6]. Firstly, the ground state of Ag cluster was optimized based on the crystal structure, then the UV-Vis spectrum was mimicked at the same theoretical level. Considering the inner-sphere electron transfer was involved in the mixed-valent complex, the constrained density functional theory (CDFT) was thus employed to construct the excited state which triggered by X-ray spectrum [7]. Although the

Ag(0) was possibly contained in the compound, in the CDFT calculation, the charge of Ag still be set as 0.6 for the sake of convergence. The electrostatic potential surface and the molecular orbitals were calculated and visualized by Multiwfn program [8].

### **Experimental Section.**

**Synthesis of  $(^t\text{BuAgC}\equiv\text{C})_n$ :**  $\text{Ag}_2\text{O}$  (1 g, 4.3 mmol) was weighed into a 100 mL flask, and 50 mL of ammonium hydroxide was added. The solution was filtered after stirring for 10 min when almost all the silver oxide was dissolved. Then 3,3-dimethyl-1-butyne (1164  $\mu\text{L}$ , 9.46 mmol) in 5 mL of ethanol was added to the solution under stirring, and white precipitate was formed immediately. After stirring in the dark for 30min, the white precipitate with solution was filtered and subsequently washed with water, ethanol and ether to give 1.2 g  $(^t\text{BuAgC}\equiv\text{C})_n$  (74% yield based on Ag).

**Caution!** Due to the explosive nature of silver alkynyls, great care should be taken and only small amounts should be used.

**Synthesis of  $\text{Cl}@Ag_{14}\text{BF}_4$ :**  $\text{AgBF}_4$  (20 mg, 0.1 mmol) and  $(^t\text{BuAgC}\equiv\text{C})_n$  (78 mg, 0.4 mmol) was dissolved in 5 mL  $\text{CH}_3\text{OH}$  under ultrasonication. To the resulting solution  $\text{NaCl}$  (3 mg, 0.05 mmol) was added. The mixture was sealed and heated 70 °C for 24h. After cooled to room temperature, the colorless solution was filtered and the filtrate was evaporated slowly in air at room temperature in the dark. Approximately three days later, colorless prismatic block crystals appeared at the bottom of the bottle. Yield: 60% (63.0 mg) (based on  $(^t\text{BuAgC}\equiv\text{C})_n$ ). Elemental analysis (found (calculated), %; based on  $\text{C}_{72}\text{H}_{108}\text{ClBF}_4\text{Ag}_{14}$ : C, 33.23 (33.18); H, 4.20 (4.18).

The compounds,  $[\text{F}@Ag_{14}(\text{C}\equiv\text{C}^t\text{Bu})_{12}]\text{OH}$ , and  $[\text{Br}@Ag_{14}(\text{C}\equiv\text{C}^t\text{Bu})_{12}]\text{OH}$  were synthesized based on previous reports [9][10].

All of the Ag<sub>14</sub>-M-X in the picture represent Ag<sub>14</sub>-M after Cu-K $\alpha$ <sub>1</sub> X-ray irradiation!

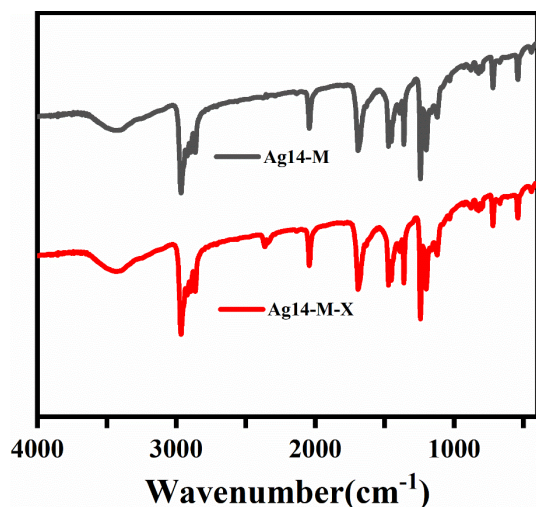

**Fig. S1.** Fourier-transform infrared spectroscopy (FTIR) of Ag<sub>14</sub>-M before and after Cu-K $\alpha$ <sub>1</sub> X-ray irradiation.

The anomalous peak appearing at the 2300 position is attributed to instrumental error .

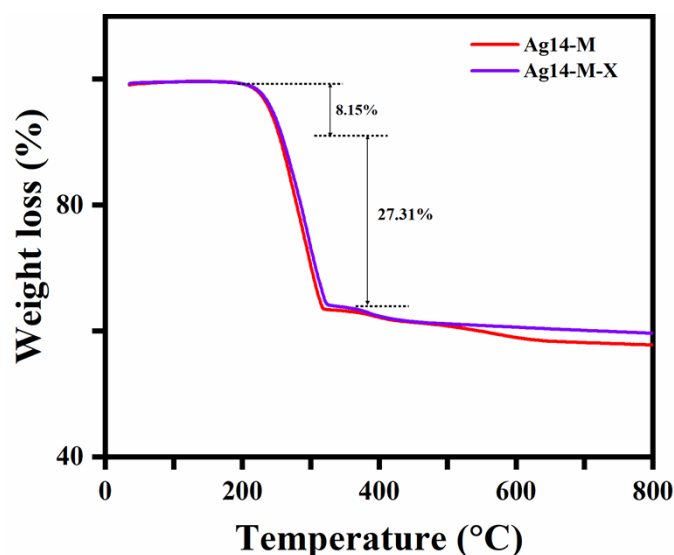

**Fig. S2.** TG curves of Ag<sub>14</sub>-M and Ag<sub>14</sub>-M-X under N<sub>2</sub> atmosphere with a heating rate of 10 °C/min.

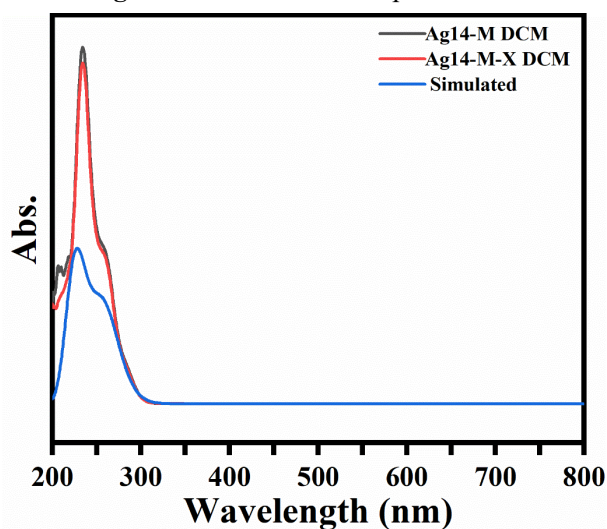

**Fig. S3.** Experimental and calculated absorption spectra of Ag<sub>14</sub>-M cluster in CH<sub>2</sub>Cl<sub>2</sub> at room temperature.

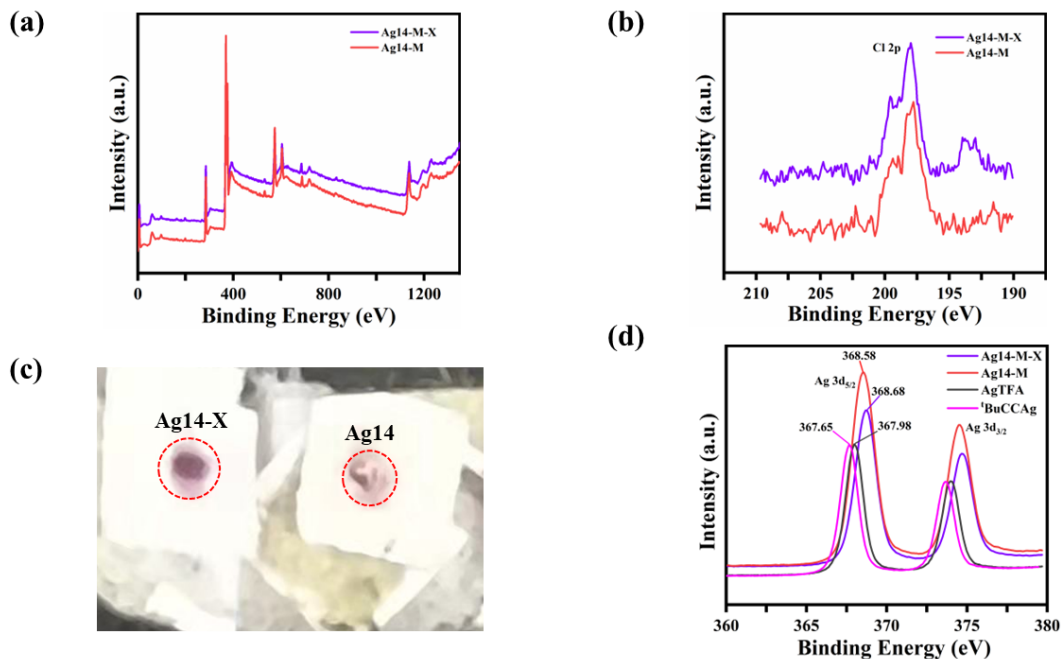

**Fig. S4.** (a) Survey XPS spectrum of  $\text{Ag}_{14}\text{-M}$  before and after  $\text{Cu-K}\alpha_1$  X-ray irradiation. (b) XPS of Cl 2p. (c) The powder of  $\text{Ag}_{14}\text{-M}$  after Al- $\text{K}\alpha$  irradiation. (d) XPS signals of Ag3d for original  $\text{Ag}_{14}\text{-M}$  (red line),  $\text{Ag}_{14}\text{-M}$  after X-ray striking ( $\text{Ag}_{14}\text{-M-X}$ ) (purple line), AgTFA (Black line) and  ${}^1\text{BuC}\equiv\text{CAg}$  (Magenta line).

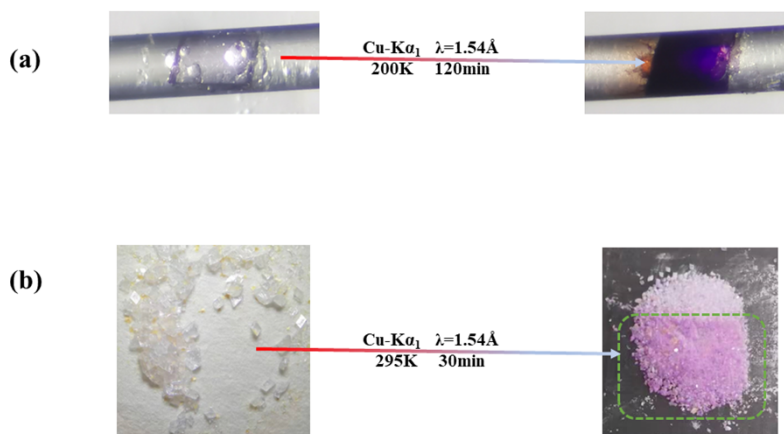

**Fig. S5.** (a)  $\text{Ag}_{14}\text{-II}$  crystal was induced photochromism by X-rays in mother liquor. (b)  $\text{Ag}_{14}\text{-M}$  crystal was induced photochromism by X-rays in the atmosphere.

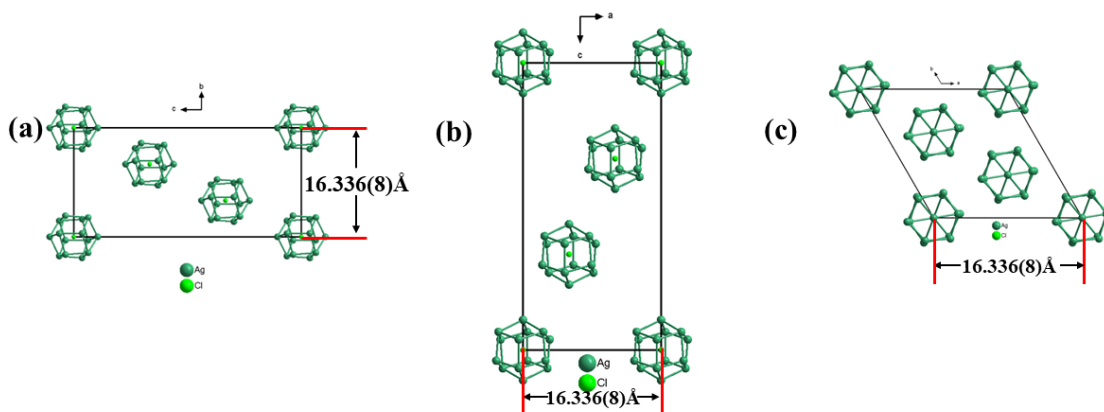

**Fig. S6.** The stacking pattern of the  $\text{Ag}_{14}\text{-II}$  along the a (a), b (b) and c (c) axis. The most recent inter-cluster distance is 16.336(8) Å

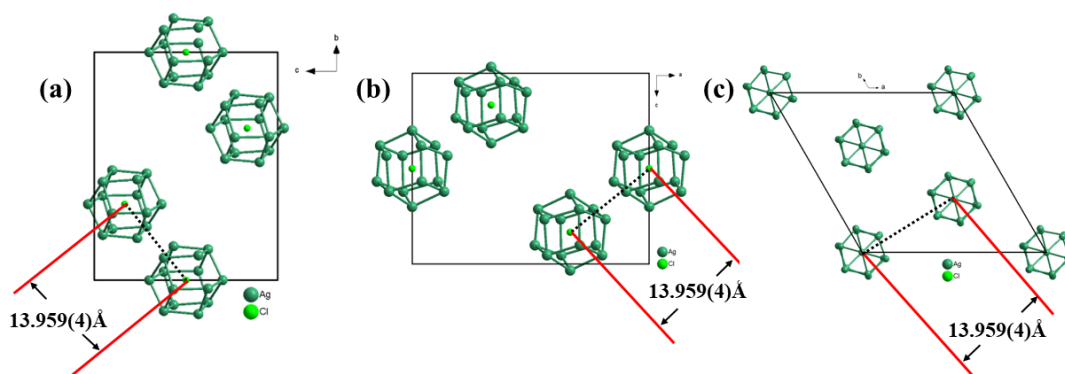

**Fig. S7.** The stacking pattern of the  $\text{Ag}_{14}\text{-I}$  along the a (a), b (b) and c (c) axis. The most recent inter-cluster distance is 13.959(4) Å

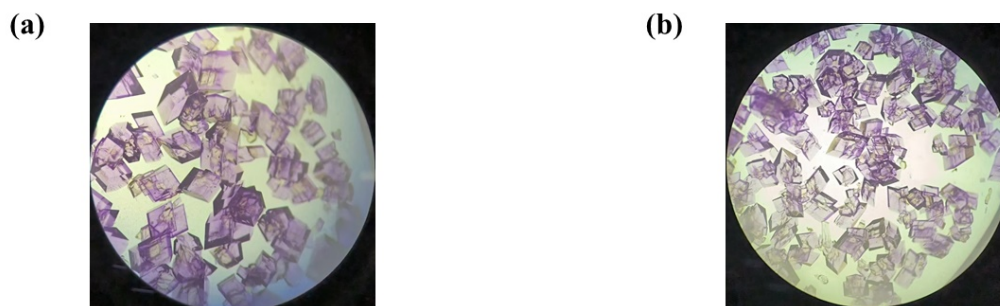

**Fig. S8.** (a)  $\text{Ag}_{14}\text{-M-X}$  heating at 60°C under visible light for 24h. (b)  $\text{Ag}_{14}\text{-M-X}$  keeping in darkness for 24h.

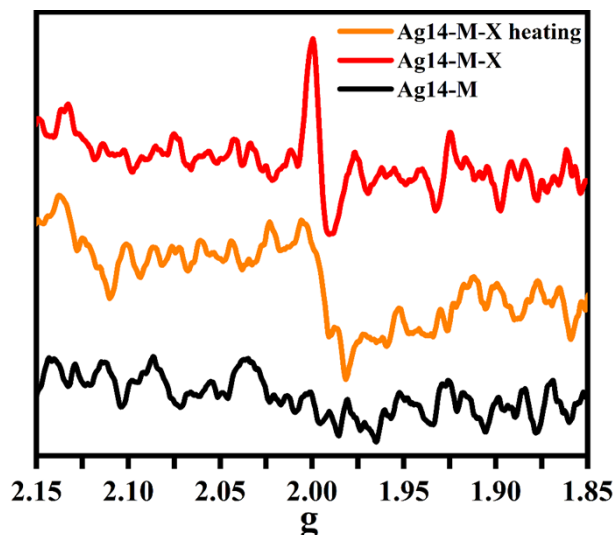

**Fig. S9.** Electron spin resonance (ESR) spectrum of  $\text{Ag}_{14}\text{-M}$ ,  $\text{Ag}_{14}\text{-M-X}$  and  $\text{Ag}_{14}\text{-M-X}$  after heating. Due to the sample was slightly damaged after heating, the signal was not consistent with that before heating, but the signal did not disappear.

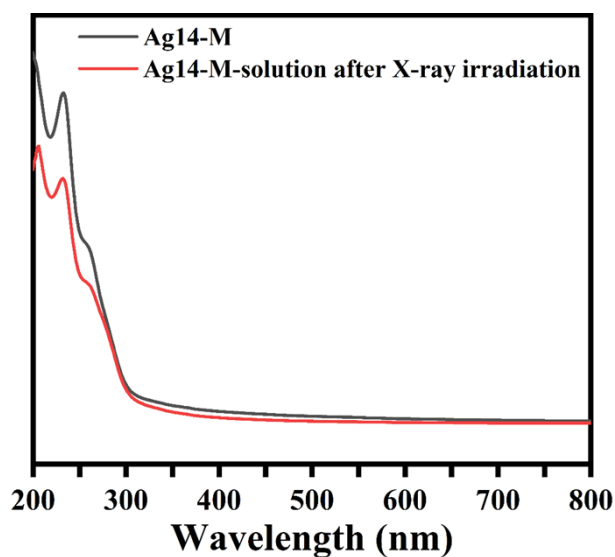

**Fig. S10.** UV-vis absorption spectrum of  $\text{Ag}_{14}\text{-M}$  in MeOH before and after X-ray irradiation.

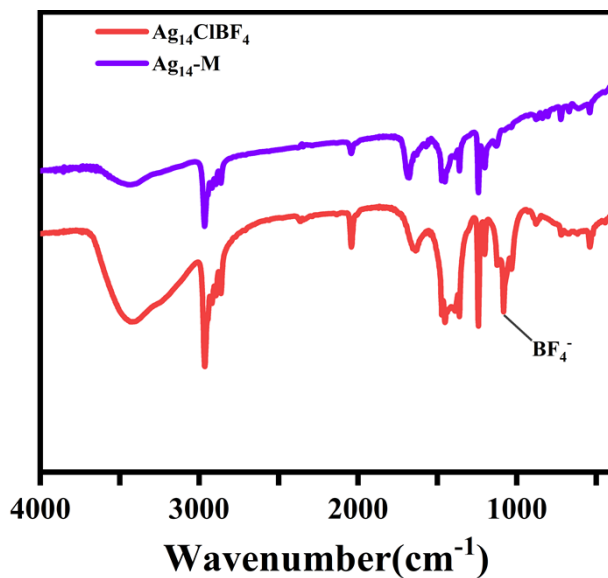

Fig. S11. FTIR of  $\text{Ag}_{14}\text{-M}$  and  $\text{Ag}_{14}\text{CIBF}_4$ , the peak in  $1083\text{cm}^{-1}$  is  $\text{BF}_4^-$ .

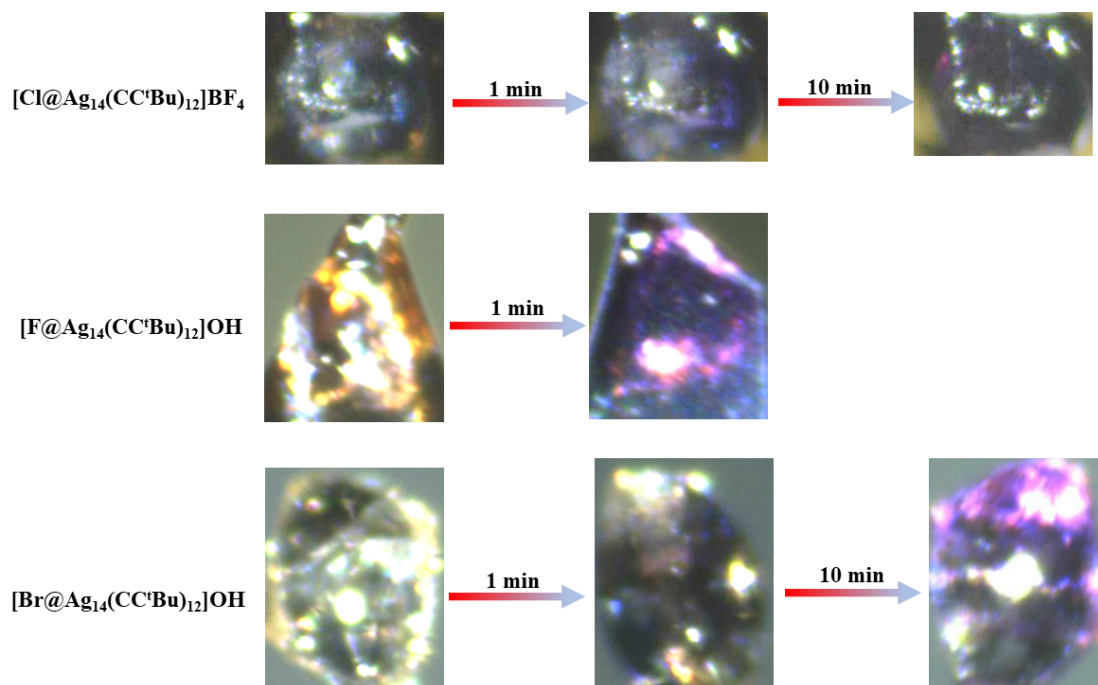

Fig. S12.  $\text{Cl@Ag}_{14}\text{BF}_4$ ,  $\text{F@Ag}_{14}\text{OH}$ ,  $\text{Br@Ag}_{14}\text{OH}$  was induced photochromism respectively after being irradiated by  $\text{Ga-K}\alpha_1$ .

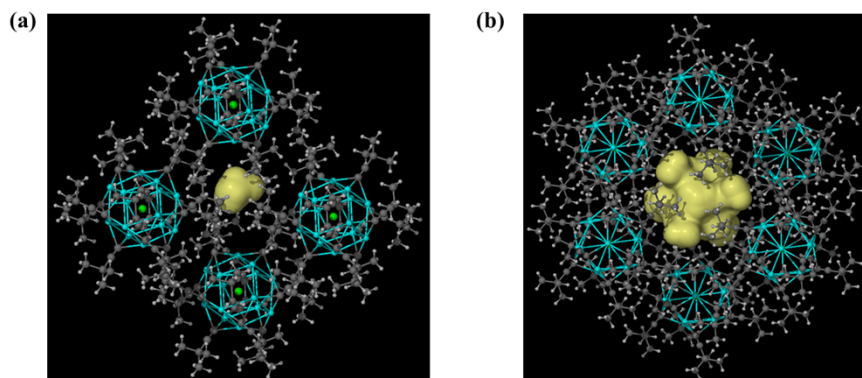

Fig. S13. The independent lattice void in  $\text{Ag}_{14}\text{-I}$  (a) and  $\text{Ag}_{14}\text{-II}$  (b), the yellow areas are voids.



**Table S1.** Crystal data and structure refinement of **Ag<sub>14</sub>-I** which reported and collected with Ga-K $\alpha$ .

| Compound                                       | Ag <sub>14</sub> -I <sup>a</sup>                              | Ag <sub>14</sub> -I-Ga <sup>b</sup>                           |
|------------------------------------------------|---------------------------------------------------------------|---------------------------------------------------------------|
| CCDC                                           | 163113                                                        | 2284351                                                       |
| Empirical formula                              | C72H109OClAg14                                                | C72H109Ag14ClO                                                |
| Formula weight                                 | 2536.22                                                       | 2536.22                                                       |
| Temperature/K                                  | 293(2)                                                        | 100                                                           |
| Crystal system                                 | Rhombohedral                                                  | trigonal                                                      |
| Space group                                    | <i>R</i> -3                                                   | <i>R</i> -3                                                   |
| <i>a</i> /Å                                    | 22.438(2)                                                     | 21.8873(7)                                                    |
| <i>b</i> /Å                                    | 22.438(2)                                                     | 21.8873(7)                                                    |
| <i>c</i> /Å                                    | 15.601(2)                                                     | 15.5998(8)                                                    |
| $\alpha$ /°                                    | 90                                                            | 90                                                            |
| $\beta$ /°                                     | 90                                                            | 90                                                            |
| $\gamma$ /°                                    | 120                                                           | 120                                                           |
| Volume/Å <sup>3</sup>                          | 6801.8(13)                                                    | 6471.9(5)                                                     |
| <i>Z</i>                                       | 3                                                             | 3                                                             |
| $\rho_{\text{calc}}$ /g/cm <sup>3</sup>        | 1.858                                                         | 1.952                                                         |
| $\mu$ /mm <sup>-1</sup>                        | 3.010                                                         | 17.327                                                        |
| <i>F</i> (000)                                 | 3672                                                          | 3672                                                          |
| Radiation                                      | Mo K $\alpha$ ( $\lambda$ = 0.71073)                          | Ga K $\alpha$ ( $\lambda$ = 1.34139)                          |
| 2 $\theta$ range for data collection/°         | 3.64 to 50                                                    | 9.5 to 123.482                                                |
| Index ranges                                   | $0 \leq h \leq 25, -26 \leq k \leq 0, 0 \leq l \leq 18$       | $-28 \leq h \leq 26, -25 \leq k \leq 27, -20 \leq l \leq 20$  |
| Reflections collected                          | 2823                                                          | 16626                                                         |
| Independent reflections                        | 2618 [ $R_{\text{int}} = 0.0353, R_{\text{sigma}} = 0.0660$ ] | 3352 [ $R_{\text{int}} = 0.0674, R_{\text{sigma}} = 0.0517$ ] |
| Data/restraints/parameters                     | 2618/234/156                                                  | 3352/126/197                                                  |
| Goodness-of-fit on <i>F</i> <sup>2</sup>       | -----                                                         | 1.192                                                         |
| Final <i>R</i> indexes [ $I \geq 2\sigma(I)$ ] | $R_1^c = \text{-----}, wR_2 = \text{-----}$                   | $R_1 = 0.0969, wR_2 = 0.2236$                                 |
| Final <i>R</i> indexes [all data]              | $R_1 = 0.1332, wR_2 = \text{-----}$                           | $R_1 = 0.1041, wR_2 = 0.2266$                                 |
| Largest diff. peak/hole / e Å <sup>-3</sup>    | 0.78/-0.44                                                    | 1.73/-2.12                                                    |

<sup>a</sup>The reported **Ag<sub>14</sub>-I**.

<sup>b</sup>The parameters of **Ag<sub>14</sub>-I** collected with Ga-K $\alpha$ .

$$^c R_1 = \frac{\sum ||F_o| - |F_c||}{\sum |F_o|}, wR_2 = \left\{ \frac{\sum [w(F_o^2 - F_c^2)^2]}{\sum [w(F_o^2)^2]} \right\}^{1/2}.$$

**Table S2.** Typical bond length [Å] and angle [°] of **Ag<sub>14</sub>-Mo**, **Ag<sub>14</sub>-Cu-1** and **Ag<sub>14</sub>-Cu-2**.

| Bond distance/angle                     | Ag <sub>14</sub> -II-Mo | Bond distance/angle                     | Ag <sub>14</sub> -II-Cu-1 | Bond distance/angle                     | Ag <sub>14</sub> -II-Cu-2 |
|-----------------------------------------|-------------------------|-----------------------------------------|---------------------------|-----------------------------------------|---------------------------|
| Ag1-Ag2                                 | 2.9443(5)               | Ag1-Ag2                                 | 2.9412(6)                 | Ag1-Ag2                                 | 2.9414(10)                |
| Ag1-Ag3                                 | 2.920(4)                | Ag1-Ag3                                 | 2.938(3)                  | Ag1-Ag3 <sup>i</sup>                    | 2.942(3)                  |
| Ag1-Ag3 <sup>b</sup>                    | 2.842(4)                | Ag1-Ag3 <sup>e</sup>                    | 2.937(3)                  | Ag1-Ag3                                 | 2.942(3)                  |
| Ag1-Ag3 <sup>a</sup>                    | 2.959(3)                | Ag1-Ag3 <sup>f</sup>                    | 2.876(3)                  | Ag1-Ag3 <sup>j</sup>                    | 2.886(5)                  |
| Ag2 -Ag1- Ag3 <sup>a</sup>              | 118.11(10)              | Ag2 -Ag1- Ag3                           | 73.97(6)                  | Ag2 -Ag1- Ag3                           | 74.05(9)                  |
| Ag2 -Ag1 -Ag3 <sup>b</sup>              | 74.31(9)                | Ag2 -Ag1 -Ag3 <sup>f</sup>              | 118.52(11)                | Ag2 -Ag1 -Ag3 <sup>i</sup>              | 118.58(15)                |
| Ag3 -Ag1 -Ag2                           | 73.18(9)                | Ag3 <sup>e</sup> -Ag1 -Ag2              | 74.88(6)                  | Ag3 <sup>i</sup> -Ag1 -Ag2              | 74.88(7)                  |
| Ag3 <sup>b</sup> -Ag1 -Ag3              | 118.37(15)              | Ag3 <sup>e</sup> -Ag1 -Ag3              | 118.52(2)                 | Ag3 <sup>i</sup> -Ag1 -Ag3 <sup>i</sup> | 118.8(3)                  |
| Ag3 -Ag1 -Ag3 <sup>a</sup>              | 75.14(7)                | Ag3 <sup>f</sup> -Ag1 -Ag3              | 74.80(10)                 | Ag3 -Ag1 -Ag3 <sup>i</sup>              | 75.01(13)                 |
| Ag3 <sup>a</sup> -Ag1 -Ag3 <sup>b</sup> | 76.31(7)                | Ag3 <sup>f</sup> -Ag1 -Ag3 <sup>e</sup> | 75.74(10)                 | Ag3 <sup>i</sup> -Ag1 -Ag3              | 75.85(11)                 |
| Ag1 <sup>b</sup> -Ag2 -Ag1              | 103.867(18)             | Ag <sup>j</sup> -Ag2 -Ag1               | 104.04(2)                 | Ag1 <sup>k</sup> -Ag2 -Ag1              | 104.18(4)                 |
| Ag1 <sup>c</sup> -Ag2 -Ag1              | 103.868(18)             | Ag <sup>j</sup> -Ag2 -Ag1 <sup>f</sup>  | 104.04(2)                 | Ag1 <sup>k</sup> -Ag2 -Ag1 <sup>j</sup> | 104.18(4)                 |
| Ag1 <sup>c</sup> -Ag2 -Ag1 <sup>b</sup> | 103.870(18)             | Ag1 <sup>f</sup> -Ag2 -Ag1              | 104.04(2)                 | Ag1 <sup>j</sup> -Ag2 -Ag1              | 104.18(4)                 |
| Ag1 -Ag3 -Ag1 <sup>d</sup>              | 102.96(9)               | Ag1 <sup>h</sup> -Ag3 -Ag1              | 103.50(12)                | Ag1 <sup>k</sup> -Ag3 -Ag1 <sup>l</sup> | 104.78(17)                |
| Ag1 <sup>c</sup> -Ag3 -Ag1              | 107.13(17)              | Ag1 <sup>h</sup> -Ag3 -Ag1 <sup>g</sup> | 105.06(13)                | Ag1 -Ag3 -Ag1 <sup>l</sup>              | 103.38(13)                |
| Ag1 <sup>c</sup> -Ag3 -Ag1 <sup>d</sup> | 104.90(9)               | Ag1 <sup>g</sup> -Ag3 -Ag1              | 105.77(13)                | Ag1 <sup>k</sup> -Ag3 -Ag1              | 105.55(19)                |

**Symmetry codes:** a: 1/3-Y+X,-1/3+X,2/3-Z b: 1-Y,+X-Y,+Z c: 1+Y-X,1-X,+Z d: 1/3+Y,2/3-X+Y,2/3-Z

e: -1/3+Y,1/3-X+Y,4/3-Z f: +Y-X,1-X,+Z g: 1-Y,1+X-Y,+Z h: 2/3-Y+X,1/3+X,4/3-Z

i: -1/3+Y,1/3-X+Y,4/3-Z j: +Y-X,1-X,+Z k: 1-Y,1+X-Y,+Z l: 2/3-Y+X,1/3+X,4/3-Z

**Table S3.** Crystal data and structure refinement of Ag<sub>14</sub> collected with Ga-K $\alpha$  under different temperature.

| Compound                                                          | Ag <sub>14</sub> -II-Ga-100K                                                 | Ag <sub>14</sub> - II-Ga-302K                                                |
|-------------------------------------------------------------------|------------------------------------------------------------------------------|------------------------------------------------------------------------------|
| CCDC                                                              | 2303298                                                                      | 2303299                                                                      |
| Empirical formula                                                 | C72H109OClAg14                                                               | C72H109Ag14ClO                                                               |
| Formula weight                                                    | 2536.22                                                                      | 2536.22                                                                      |
| Temperature/K                                                     | 100                                                                          | 302                                                                          |
| Crystal system                                                    | trigonal                                                                     | trigonal                                                                     |
| Space group                                                       | <i>R</i> -3                                                                  | <i>R</i> -3                                                                  |
| <i>a</i> /Å                                                       | 16.1523(6)                                                                   | 16.438(3)                                                                    |
| <i>b</i> /Å                                                       | 16.1523(6)                                                                   | 16.438(3)                                                                    |
| <i>c</i> /Å                                                       | 29.3979(16)                                                                  | 29.900(7)                                                                    |
| $\alpha$ /°                                                       | 90                                                                           | 90                                                                           |
| $\beta$ /°                                                        | 90                                                                           | 90                                                                           |
| $\gamma$ /°                                                       | 120                                                                          | 120                                                                          |
| Volume/Å <sup>3</sup>                                             | 6642.3(6)                                                                    | 6996(3)                                                                      |
| <i>Z</i>                                                          | 3                                                                            | 3                                                                            |
| $\rho_{\text{calc}}$ /g/cm <sup>3</sup>                           | 1.936                                                                        | 1.806                                                                        |
| $\mu$ /mm <sup>-1</sup>                                           | 16.891                                                                       | 16.028                                                                       |
| <i>F</i> (000)                                                    | 3753.0                                                                       | 3672                                                                         |
| Radiation                                                         | Ga K $\alpha$ ( $\lambda$ = 1.34139)                                         | Ga K $\alpha$ ( $\lambda$ = 1.34139)                                         |
| 2 $\theta$ range for data collection/°                            | 9.528 to 106.126                                                             | 9.362 to 84.986                                                              |
| Index ranges                                                      | -18 $\leq$ h $\leq$ 19, -19 $\leq$ k $\leq$ 15, -20 $\leq$ l $\leq$ 34       | -16 $\leq$ h $\leq$ 15, -16 $\leq$ k $\leq$ 16, -27 $\leq$ l $\leq$ 30       |
| Reflections collected                                             | 12933                                                                        | 7045                                                                         |
| Independent reflections                                           | 2598 [ <i>R</i> <sub>int</sub> = 0.0630, <i>R</i> <sub>sigma</sub> = 0.0438] | 1645 [ <i>R</i> <sub>int</sub> = 0.0660, <i>R</i> <sub>sigma</sub> = 0.0493] |
| Data/restraints/parameters                                        | 2598/174/208                                                                 | 1645/102/169                                                                 |
| Goodness-of-fit on <i>F</i> <sup>2</sup>                          | 1.057                                                                        | 1.072                                                                        |
| Final <i>R</i> indexes [ <i>I</i> $\geq$ 2 $\sigma$ ( <i>I</i> )] | <i>R</i> <sub>1</sub> <sup>a</sup> = 0.0653, <i>wR</i> <sub>2</sub> = 0.1843 | <i>R</i> <sub>1</sub> = 0.0660, <i>wR</i> <sub>2</sub> = 0.1889              |
| Final <i>R</i> indexes [all data]                                 | <i>R</i> <sub>1</sub> = 0.0758, <i>wR</i> <sub>2</sub> = 0.1940              | <i>R</i> <sub>1</sub> = 0.0769, <i>wR</i> <sub>2</sub> = 0.2001              |
| Largest diff. peak/hole / e Å <sup>-3</sup>                       | 1.19/-1.35                                                                   | 1.03/-1.02                                                                   |

$$^a R_1 = \frac{\sum ||F_o| - |F_c||}{\sum |F_o|}, wR_2 = \left\{ \frac{\sum [w(F_o^2 - F_c^2)^2]}{\sum [w(F_o^2)^2]} \right\}^{1/2}.$$

**Table S4.** Typical bond length [Å] and angle [°] of **Ag<sub>14</sub>-II-Ga-100K** and **Ag<sub>14</sub>-II-Ga-302K**

| Bond distance/angle                     | Ag <sub>14</sub> -II-Ga-100K | Bond distance/angle                     | Ag <sub>14</sub> -II-Ga-302K |
|-----------------------------------------|------------------------------|-----------------------------------------|------------------------------|
| Ag1-Ag2                                 | 2.9324(9)                    | Ag1-Ag3                                 | 2.9494(15)                   |
| Ag1-Ag3                                 | 2.873(3)                     | Ag1-Ag2                                 | 2.9631(16)                   |
| Ag1-Ag3 <sup>a</sup>                    | 2.924(3)                     | Ag1-Ag2 <sup>e</sup>                    | 2.9102(16)                   |
| Ag1-Ag3 <sup>b</sup>                    | 2.9382(19)                   | Ag1-Ag2 <sup>f</sup>                    | 2.982(2)                     |
| Ag3 -Ag1- Ag3 <sup>a</sup>              | 75.82(8)                     | Ag2 <sup>f</sup> -Ag1- Ag2 <sup>e</sup> | 76.45(4)                     |
| Ag3 <sup>a</sup> -Ag1 -Ag3 <sup>b</sup> | 74.83(10)                    | Ag2 -Ag1 -Ag2 <sup>f</sup>              | 75.66(4)                     |
| Ag3 -Ag1 -Ag3 <sup>b</sup>              | 118.68(19)                   | Ag2 <sup>e</sup> -Ag1 -Ag2              | 120.30(6)                    |
| Ag3 -Ag1 -Ag2                           | 74.96(4)                     | Ag2 <sup>e</sup> -Ag1 -Ag3              | 75.29(4)                     |
| Ag2 -Ag1 -Ag3 <sup>a</sup>              | 118.55(10)                   | Ag2 <sup>f</sup> -Ag1 -Ag3              | 119.47(6)                    |
| Ag2 -Ag1 -Ag3 <sup>b</sup>              | 73.99(6)                     | Ag3 -Ag1 -Ag2                           | 74.51(4)                     |
| Ag1 <sup>b</sup> -Ag2 -Ag1              | 104.18(3)                    | Ag1 <sup>g</sup> -Ag2 - Ag1             | 104.62(6)                    |
| Ag1 <sup>d</sup> -Ag2 -Ag1              | 104.18(3)                    | Ag1 <sup>g</sup> -Ag2 -Ag1 <sup>f</sup> | 103.91(5)                    |
| Ag1 <sup>d</sup> -Ag2-Ag1 <sup>b</sup>  | 104.18(3)                    | Ag1 <sup>h</sup> -Ag2 -Ag1              | 102.63(5)                    |
| Ag1 -Ag3 -Ag1 <sup>d</sup>              | 105.55(12)                   | Ag1 <sup>e</sup> -Ag3 -Ag1              | 103.99(5)                    |
| Ag1 <sup>c</sup> -Ag3 -Ag1              | 105.02(13)                   | Ag1 <sup>g</sup> -Ag3 -Ag1              | 103.99(5)                    |
| Ag1 <sup>c</sup> -Ag3 -Ag1 <sup>d</sup> | 103.37(10)                   | Ag1 <sup>g</sup> -Ag3-Ag1 <sup>h</sup>  | 103.99(5)                    |

**Symmetry codes:** a: -1/3+Y,1/3-X+Y,4/3-Z b: +Y-X,1-X,+Z c: 2/3-Y+X,1/3+X,4/3-Z d: 1-Y,1+X-Y,+Z  
e: 1/3-Y+X,-1/3+X,2/3-Z f: 1-Y,+X-Y,+Z g: 1+Y-X,1-X,+Z h: 1/3+Y,2/3-X+Y,2/3-Z

**Table S5.** XPS Ag 3d<sub>5/2</sub> peak binding energy range for Ag(0) and Ag(I) states.

| S. No. | compound                                                                                                                     | Ag 3d <sub>5/2</sub> position (in eV) for Ag <sup>0</sup> | Ag 3d <sub>5/2</sub> position (in eV) for Ag <sup>I</sup> | Reference                                        |
|--------|------------------------------------------------------------------------------------------------------------------------------|-----------------------------------------------------------|-----------------------------------------------------------|--------------------------------------------------|
| 1      | Ag, Ag <sub>2</sub> CO <sub>3</sub>                                                                                          | 367.9                                                     | 367.3                                                     | <i>Anal. Chem.</i> 1975, 47, 2193                |
| 2      | Ag, Ag <sub>2</sub> O                                                                                                        | 368.0                                                     | 367.7                                                     | <i>J. Phys. Chem.</i> 1994, 98, 8519             |
| 3      | Ag, Ag <sub>2</sub> O                                                                                                        | 368.4                                                     | 367.9                                                     | <i>Nano Lett.</i> 2005, 5, 2319                  |
| 4      | Ag, AgBr                                                                                                                     | 368.3                                                     | 367.5                                                     | <i>ACS Nano</i> 2011, 5, 4529                    |
| 5      | Ag, Ag <sub>2</sub> S                                                                                                        | 368.2                                                     | 367.8                                                     | <i>Angew. Chem. Int. Ed.</i> 2012, 51, 11501     |
| 6      | (PDDA/PSS) <sub>5</sub> /2Au@2Ag                                                                                             | 368.4                                                     | ---                                                       | <i>Adv. Mater.</i> 2012, 24, 4574                |
| 7      | [Ag <sub>15</sub> Cu <sub>6</sub> (C≡CR) <sub>18</sub> (DPPE) <sub>2</sub> ] <sup>-</sup>                                    | 368.1                                                     | ---                                                       | <i>J. Am. Chem. Soc.</i> 2023, 145, 6, 3401–3407 |
| 8      | [Ag <sub>22</sub> Cu <sub>7</sub> (C≡CR) <sub>16</sub> (PPh <sub>3</sub> ) <sub>5</sub> Cl <sub>6</sub> ](PPh <sub>4</sub> ) | 368.0                                                     | ---                                                       | <i>Angew. Chem.</i> 2023, 135, e202217483        |
| 9      | Ag <sub>12</sub> Cu <sub>4</sub> (C≡CR) <sub>14</sub> (PPh <sub>3</sub> ) <sub>4</sub>                                       | 368.1                                                     | ----                                                      | <i>J. Phys. Chem. C</i> 2022, 126, 20577–20583   |
| 10     | [PdHAg <sub>19</sub> (S <sub>2</sub> P(O <sup>+</sup> Pr) <sub>2</sub> ) <sub>12</sub> ]                                     | 368.43                                                    | ----                                                      | <i>Chem. Eur. J.</i> 2023, 29, e202300730        |

**Table S6.** Crystal data and structure refinement of Ag<sub>14</sub>-F-OH, Ag<sub>14</sub>-Br-OH and Ag<sub>14</sub>-Cl-BF<sub>4</sub> collected with Ga-K $\alpha$

| Compound                                                     | Ag <sub>14</sub> -F-OH                                                       | Ag <sub>14</sub> -Br-OH                                                      | Ag <sub>14</sub> -Cl-BF <sub>4</sub>                                         |
|--------------------------------------------------------------|------------------------------------------------------------------------------|------------------------------------------------------------------------------|------------------------------------------------------------------------------|
| CCDC                                                         | 2313779                                                                      | 2313778                                                                      | 2314495                                                                      |
| Empirical formula                                            | C72H109OFAg14                                                                | C72H109Ag14BrO                                                               | C72H109Ag14ClBF4                                                             |
| Formula weight                                               | 2519.77                                                                      | 2580.68                                                                      | 2606.02                                                                      |
| Temperature/K                                                | 100                                                                          | 100                                                                          | 200.01(10)                                                                   |
| Crystal system                                               | trigonal                                                                     | trigonal                                                                     | trigonal                                                                     |
| Space group                                                  | <i>R</i> -3                                                                  | <i>R</i> -3                                                                  | <i>R</i> -3                                                                  |
| <i>a</i> /Å                                                  | 21.8992(8)                                                                   | 21.9600(6)                                                                   | 16.5410(9)                                                                   |
| <i>b</i> /Å                                                  | 21.8992(8)                                                                   | 21.9600(6)                                                                   | 16.5410(9)                                                                   |
| <i>c</i> /Å                                                  | 15.4850(8)                                                                   | 15.4656(7)                                                                   | 29.8249(19)                                                                  |
| $\alpha$ /°                                                  | 90                                                                           | 90                                                                           | 90                                                                           |
| $\beta$ /°                                                   | 90                                                                           | 90                                                                           | 90                                                                           |
| $\gamma$ /°                                                  | 120                                                                          | 120                                                                          | 120                                                                          |
| Volume/Å <sup>3</sup>                                        | 6431.3(6)                                                                    | 6458.9(5)                                                                    | 7067.0(9)                                                                    |
| <i>Z</i>                                                     | 3                                                                            | 3                                                                            | 3                                                                            |
| $\rho_{\text{calc}}/\text{cm}^3$                             | 1.952                                                                        | 1.990                                                                        | 1.837                                                                        |
| $\mu/\text{mm}^{-1}$                                         | 16.949                                                                       | 17.533                                                                       | 2.905                                                                        |
| <i>F</i> (000)                                               | 3648.0                                                                       | 3726.0                                                                       | 3768.0                                                                       |
| Radiation                                                    | Ga K $\alpha$ ( $\lambda$ = 1.34139)                                         | Ga K $\alpha$ ( $\lambda$ = 1.34139)                                         | Mo K $\alpha$ ( $\lambda$ = 0.71073)                                         |
| 2 $\theta$ range for data collection/°                       | 9.514 to 110.99                                                              | 9.498 to 116.042                                                             | 3.942 to 57.514                                                              |
| Index ranges                                                 | -26 ≤ <i>h</i> ≤ 25, -23 ≤ <i>k</i> ≤ 26, -19 ≤ <i>l</i> ≤ 16                | -23 ≤ <i>h</i> ≤ 25, -27 ≤ <i>k</i> ≤ 27, -19 ≤ <i>l</i> ≤ 18                | -21 ≤ <i>h</i> ≤ 21, -21 ≤ <i>k</i> ≤ 18, -40 ≤ <i>l</i> ≤ 29                |
| Reflections collected                                        | 18282                                                                        | 16450                                                                        | 9459                                                                         |
| Independent reflections                                      | 2778 [ <i>R</i> <sub>int</sub> = 0.0609, <i>R</i> <sub>sigma</sub> = 0.0431] | 2878 [ <i>R</i> <sub>int</sub> = 0.0559, <i>R</i> <sub>sigma</sub> = 0.0448] | 3550 [ <i>R</i> <sub>int</sub> = 0.0378, <i>R</i> <sub>sigma</sub> = 0.0378] |
| Data/restraints/parameters                                   | 2778/57/169                                                                  | 2878/87/166                                                                  | 3550/162/194                                                                 |
| Goodness-of-fit on <i>F</i> <sup>2</sup>                     | 1.070                                                                        | 1.075                                                                        | 1.060                                                                        |
| Final <i>R</i> indexes [ <i>I</i> > 2 $\sigma$ ( <i>I</i> )] | <i>R</i> <sub>1</sub> <sup>a</sup> = 0.0501, <i>wR</i> <sub>2</sub> = 0.1320 | <i>R</i> <sub>1</sub> = 0.0496, <i>wR</i> <sub>2</sub> = 0.1435              | <i>R</i> <sub>1</sub> = 0.0466, <i>wR</i> <sub>2</sub> = 0.1364              |
| Final <i>R</i> indexes [all data]                            | <i>R</i> <sub>1</sub> = 0.0745, <i>wR</i> <sub>2</sub> = 0.1446              | <i>R</i> <sub>1</sub> = 0.0674, <i>wR</i> <sub>2</sub> = 0.1528              | <i>R</i> <sub>1</sub> = 0.0698, <i>wR</i> <sub>2</sub> = 0.1480              |
| Largest diff. peak/hole / e Å <sup>-3</sup>                  | 1.58/-1.39                                                                   | 1.00/-0.99                                                                   | 0.64/-0.60                                                                   |

$$^a R_1 = \sum ||F_o| - |F_c|| / \sum |F_o|. \quad wR_2 = \{ \sum [w(F_o^2 - F_c^2)^2] / \sum [w(F_o^2)] \}^{1/2}.$$

## Supplementary References

[1] CrysAlis<sup>Pro</sup> Version 1.171.36.31. Agilent Technologies Inc. Santa Clara, CA, USA, 2012.

- [2] G. M. Sheldrick, *Acta Cryst. A* 64 (2008) 112-122.
- [3] O. V. Dolomanov, L. J. Bourhis, R. J. Gildea, et al., *Appl. Cryst.* 42 (2009) 339-341.
- [4] G. M. Sheldrick, *Acta Cryst. C* 71 (2015) 3-8.
- [5] Brandenburg, K. *Diamond*, 2010.
- [6] Epifanovsky, A. T. B. Gilbert, X. Feng, J. Lee, Y. Mao, N. Mardirossian, P. Pokhilko, A. F. White, M. P. Coons, A. L. Dempwolff, Z. Gan, D. Hait, P. R. Horn, L. D. Jacobson, I. Kaliman, J. Kussmann, A. W. Lange, K. U. Lao, D. S. Levine, J. Liu, S. C. McKenzie, A. F. Morrison, K. D. Nanda, F. Plasser, D. R. Rehn, M. L. Vidal, Z.-Q. You, Y. Zhu, B. Alam, B. J. Albrecht, et al., *J. Chem. Phys.* 2021, 155, 084801.
- [7] Wu, B. Kaduk, T. Van Voorhis. *J. Chem. Phys.* 2009, 130, 034109.
- [8] Lu, F. Chen, *Multiwfn: A multifunctional wavefunction analyzer. J. Comput. Chem.* 2012, 33, 580.
- [9] D. Rais, J. Yau, D. M. P. Mingos, R. Vilar, A. J. P. White and D. J. Williams, *Angew. Chem., Int. Ed.*, 2001, 40, 3464-3467.
- [10] D. Rais, D. M. P. Mingos, R. Vilar, A. J. P. White and D. J. Williams, *J. Organomet. Chem.*, 2002, 652, 87-93.
